# Supplementary material for: Cardiopulmonary Exercise Testing in the Age of New Heart Failure Therapies: Still a Powerful Tool?
Source: MDPI journal article supplement (doi:10.3390/biomedicines11082208), 2023-08-06
Supplement: s1 [file s1]

# Supplementary Materials

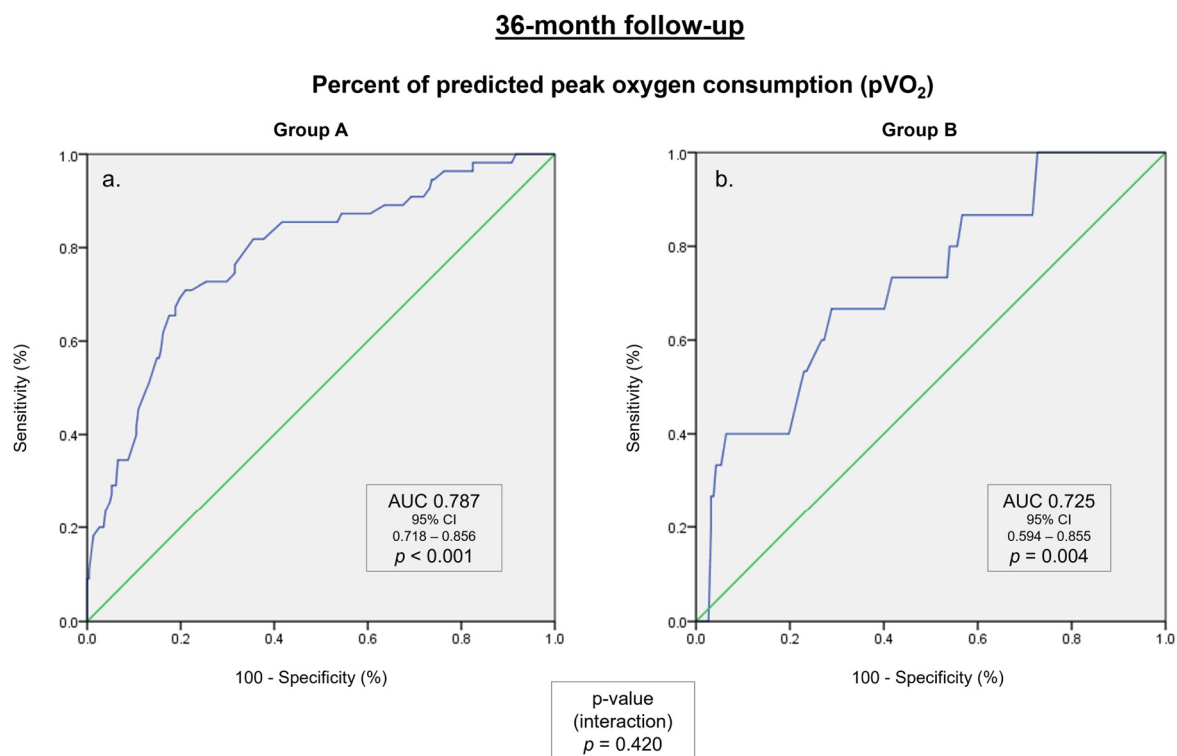

**Figure S1.** ROC curves for the composite endpoint in a 36-month follow-up. (a) Percent of predicted peak oxygen consumption (pVO<sub>2</sub>) in group A. (b) Percent of predicted pVO<sub>2</sub> in group B.

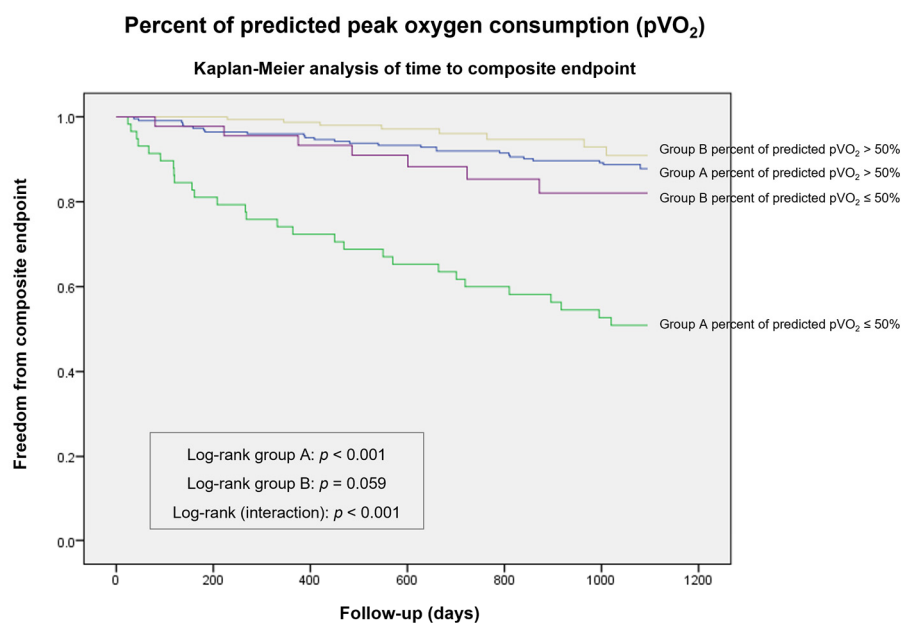

No. at risk

|                                                |     |     |     |     |     |     |     |
|------------------------------------------------|-----|-----|-----|-----|-----|-----|-----|
| Group A percent of predicted $pVO_2 \leq 50\%$ | 58  | 47  | 42  | 38  | 35  | 31  | 30  |
| Group A percent of predicted $pVO_2 > 50\%$    | 225 | 217 | 214 | 210 | 206 | 201 | 198 |
| Group B percent of predicted $pVO_2 \leq 50\%$ | 45  | 44  | 42  | 41  | 39  | 38  | 38  |
| Group B percent of predicted $pVO_2 > 50\%$    | 159 | 159 | 157 | 155 | 153 | 152 | 151 |

**Figure S2.** Kaplan–Meier survival analysis for the composite endpoint in a 36-month follow-up stratified according to the International Society for Heart and Lung Transplantation (ISHLT)-recommended threshold of percent of predicted peak oxygen consumption ( $pVO_2$ )  $\leq 50\%$  in group A and group B.

### Percent of predicted peak oxygen consumption ( $pVO_2$ )

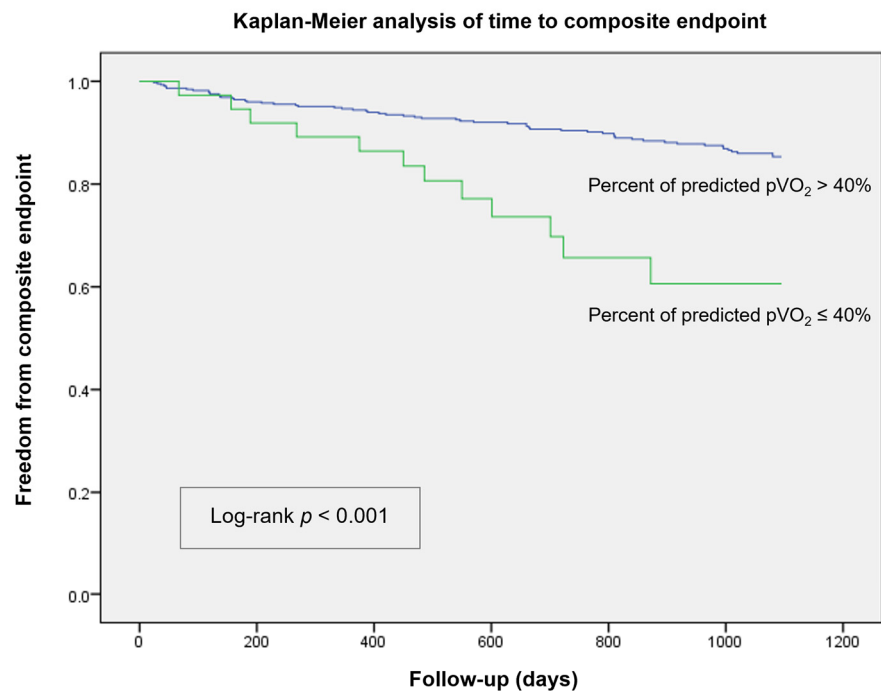

**Figure S3.** Kaplan–Meier survival analysis for the composite endpoint in a 36-month follow-up in group B stratified according to predicted peak oxygen consumption ( $pVO_2 \leq 40\%$ ).
